# Supplementary material for: Burkholderia pseudomallei genome plasticity associated with genomic island variation
Source: PubMed Central journal article supplement (PMC2386483; doi:10.1186/1471-2164-9-190), 2008-04-25

K96243

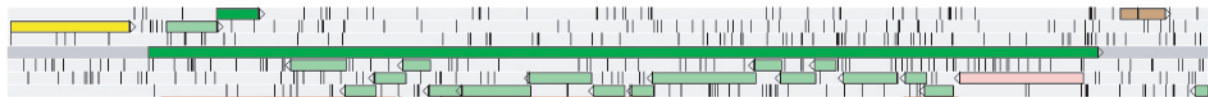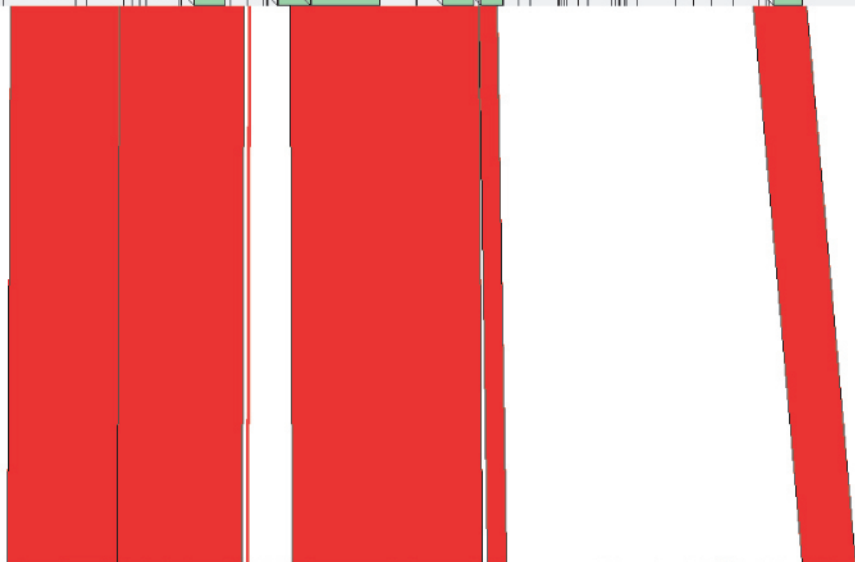

1106a

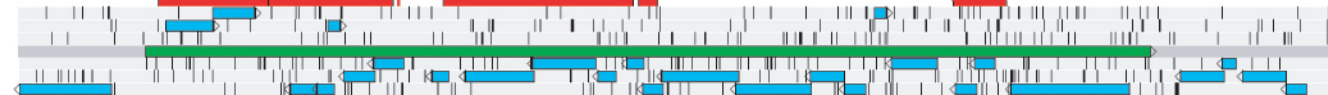

Supplement: 1471-2164-9-190-S3.pdf [file 1471-2164-9-190-S3.pdf]
